# Supplementary material for: Sensitive and Specific Analyses of Colorectal Cancer Recurrence through Multiplex superRCA Mutation Detection in Blood Plasma
Source: MDPI journal article supplement (doi:10.3390/cancers16030549), 2024-01-27
Supplement: s1 [file s1]

# Supplementary Materials

Emma Sandberg<sup>1</sup>, Luís Nunes<sup>1</sup>, Per-Henrik Edqvist<sup>1</sup>, Lucy Mathot<sup>1</sup>, Lei Chen<sup>1,2</sup>, Tomas Edgren<sup>2</sup>,  
Shahed Al Nassralla<sup>1</sup>, Bengt Glimelius<sup>1</sup>, Ulf Landegren<sup>1,\*</sup> and Tobias Sjöblom<sup>1,\*</sup>

<sup>1</sup> Science for Life Laboratory, Department of Immunology, Genetics and Pathology, Uppsala University, SE-751 85 Uppsala, Sweden; emma.sandberg@igp.uu.se (E.S.); luis.nunes@igp.uu.se (L.N.); per-henrik.edqvist@igp.uu.se (P.-H.E.); lucy.mathot@igp.uu.se (L.M.); lei.chen@raritybioscience.com (L.C.); shahed.alnassralla.9832@student.uu.se (S.A.); bengt.glimelius@igp.uu.se (B.G.)

<sup>2</sup> Rarity Bioscience AB, SE-752 37 Uppsala, Sweden; tomas.edgren@raritybioscience.com

\* Correspondence: tobias.sjoblom@igp.uu.se (T.S.); ulf.landegren@igp.uu.se (U.L.)

**Table S1.** The superRCA CRC Mutation assay target panel.

| Gene   | Amplicon ID | Mutation                                                                                                                                                                                                     |
|--------|-------------|--------------------------------------------------------------------------------------------------------------------------------------------------------------------------------------------------------------|
| KRAS   | KRAS12      | p.G12E (c.35_56delinsAG)<br>p.G12C (c.34G>T)<br>p.G12R (c.34G>C)<br>p.G12S (c.34G>A)<br>p.G12A (c.35G>C)<br>p.G12D (c.35G>A)<br>p.G12V (c.35G>T)<br>p.G13C (c.37G>T)<br>p.G13R (c.37G>C)<br>p.G13D (c.38G>A) |
|        | KRAS61      | p.A59T (c.175G>A)<br>p.Q61L (c.182A>T)<br>p.Q61H (c.183A>T)<br>p.Q61H (c.183A>C)                                                                                                                             |
|        | KRAS146     | p.A146T (c.436G>A)<br>p.K147Q (c.439A>C)<br>p.A146V (c.437C>T)                                                                                                                                               |
| NRAS   | NRAS12      | p.G12C (c.34G>T)<br>p.G12R (c.34G>C)<br>p.G12S (c.34G>A)<br>p.G12A (c.35G>C)<br>p.G12D (c.35G>A)<br>p.G12V (c.35G>T)<br>p.G13R (c.37G>C)<br>p.G13D (c.38G>A)<br>p.G13V (c.38G>T)                             |
|        | NRAS61      | p.A59T (c.175G>A)<br>p.Q61K (c.181C>A)<br>p.Q61R (c.182A>G)<br>p.Q61L (c.182A>T)<br>p.Q61H (c.183A>C)<br>p.Q61H (c.183A>T)                                                                                   |
| PIK3CA | PIK3CA112   | p.I112F (c.334A>T)<br>p.K111E (c.331A>G)                                                                                                                                                                     |

|             |            |                                                                                          |
|-------------|------------|------------------------------------------------------------------------------------------|
|             | PIK3CA545  | p.E542K (c.1624G>A)<br>p.E545K (c.1633G>A)<br>p.E545G (c.1634A>G)<br>p.Q546K (c.1636C>A) |
|             | PIK3CA1047 | p.M1043I (c.3129G>T)<br>p.H1047R (c.3140A>G)<br>p.H1047L (c.3140A>T)                     |
| <i>BRAF</i> | BRAF600    | p.V600E (c.1799T>A)<br>p.V600K (c.1798_1799 GT>AA)                                       |
| <i>AKT1</i> | AKT1       | p.E17K (c.49G>A)                                                                         |

**Table S2.** Mutant allele frequencies of hotspot mutations *a priori* known in tumor and normal gDNA by superRCA. gDNA, genomic DNA; MAF, mutant allele frequencies.

| Patient ID | Hotspot Mutation       | Tumor gDNA | Normal gDNA            |
|------------|------------------------|------------|------------------------|
|            |                        | MAF        | MAF                    |
| UU001      | <i>KRAS</i> p.G13D     | 0.4486     | $1.950 \times 10^{-6}$ |
|            | <i>PIK3CA</i> p.E542K  | 0.1314     | $6.498 \times 10^{-6}$ |
| UU002      | <i>KRAS</i> p.G12D     | 0.4869     | $3.855 \times 10^{-5}$ |
| UU003      | <i>KRAS</i> p.G12V     | 0.5072     | $7.978 \times 10^{-5}$ |
|            | <i>PIK3CA</i> p.E545K  | 0.0001     | $3.511 \times 10^{-6}$ |
| UU008      | <i>KRAS</i> p.A146V    | 0.3145     | $6.895 \times 10^{-6}$ |
| UU009      | <i>BRAF</i> p.V600E    | 0.2633     | $7.633 \times 10^{-6}$ |
| UU010      | <i>KRAS</i> p.G12D     | 0.2548     | $7.806 \times 10^{-5}$ |
| UU011      | <i>KRAS</i> p.G12E     | 0.3652     | $2.869 \times 10^{-6}$ |
| UU012      | <i>BRAF</i> p.V600E    | 0.1522     | $1.062 \times 10^{-5}$ |
| UU014      | <i>BRAF</i> p.V600E    | 0.1303     | $5.224 \times 10^{-5}$ |
| UU015      | <i>BRAF</i> p.V600E    | 0.2604     | $5.753 \times 10^{-5}$ |
|            | <i>PIK3CA</i> p.H1047R | 0.0025     | $6.560 \times 10^{-5}$ |
| UU017      | <i>BRAF</i> p.V600E    | 0.2741     | $6.925 \times 10^{-6}$ |
| UU018      | <i>KRAS</i> p.G13D     | 0.3779     | $8.641 \times 10^{-5}$ |
| UU025      | <i>NRAS</i> p.G12D     | 0.2927     | $3.279 \times 10^{-5}$ |
| UU036      | <i>BRAF</i> p.V600E    | 0.4539     | $2.089 \times 10^{-4}$ |
| UU038      | <i>PIK3CA</i> p.E542K  | 0.0003     | $3.858 \times 10^{-5}$ |

**Table S3.** Mutant allele frequencies of hotspot mutations determined by superRCA in plasma cell-free DNA at diagnosis, postoperatively and follow-up. MAF, mutant allele frequencies. N/A; Not Applicable.

| Patient ID | Hotspot Mutations | Diagnosis Plasma |                         | Postoperative Plasma |                          | Follow-up Plasma |                            |                |                            |
|------------|-------------------|------------------|-------------------------|----------------------|--------------------------|------------------|----------------------------|----------------|----------------------------|
|            |                   | DNA input (ng)   | MAF                     | DNA input (ng)       | MAF                      | DNA input (ng)   | MAF                        | DNA input (ng) | MAF                        |
| UU001      | KRAS p.G13D       | 35.69            | $1.5541 \times 10^{-2}$ | N/A                  | N/A                      | 27.00            | $9.652435 \times 10^{-2}$  | 18.00          | $1.4992918 \times 10^{-1}$ |
| UU001      | PIK3CA p.E542K    | 35.69            | $2.865 \times 10^{-3}$  | N/A                  | N/A                      | 27.00            | $2.17358 \times 10^{-2}$   | 18.00          | $5.616191 \times 10^{-2}$  |
| UU002      | KRAS p.G12D       | 32.72            | $5.040 \times 10^{-3}$  | N/A                  | N/A                      | 16.20            | $2.9701 \times 10^{-6}$    | 12.30          | $6.1279 \times 10^{-6}$    |
| UU003      | KRAS p.G12V       | 12.83            | $1.2092 \times 10^{-2}$ | N/A                  | N/A                      | 8.38             | $5.4617 \times 10^{-6}$    | 12.60          | $5.7408 \times 10^{-6}$    |
| UU003      | PIK3CA p.E545K    | 12.83            | $1.1 \times 10^{-5}$    | N/A                  | N/A                      | 8.38             | $2.8563 \times 10^{-6}$    | 12.60          | $3.2439 \times 10^{-6}$    |
| UU004      | KRAS p.G12V       | 15.26            | $1.680 \times 10^{-3}$  | 8.18                 | $7.44464 \times 10^{-3}$ | 9.83             | $6.80364 \times 10^{-3}$   | N/A            | N/A                        |
| UU008      | KRAS p.A146V      | 16.52            | $1.456 \times 10^{-3}$  | 9.83                 | $1.1264 \times 10^{-5}$  | 18.30            | $6.758 \times 10^{-6}$     | N/A            | N/A                        |
| UU009      | BRAF p.V600E      | 19.31            | $3.4561 \times 10^{-2}$ | N/A                  | N/A                      | 10.50            | $3.0716 \times 10^{-6}$    | 17.70          | $1.62 \times 10^{-5}$      |
| UU010      | KRAS p.G12D       | 29.03            | $2.930 \times 10^{-3}$  | N/A                  | N/A                      | 13.20            | $1.3208 \times 10^{-5}$    | 30.60          | $4.5509 \times 10^{-6}$    |
| UU011      | KRAS p.G12E       | 29.03            | $1.551 \times 10^{-3}$  | 16.80                | $1.911 \times 10^{-6}$   | 10.50            | $4.5968 \times 10^{-6}$    | N/A            | N/A                        |
| UU012      | BRAF p.V600E      | 38.70            | $1.725 \times 10^{-3}$  | N/A                  | N/A                      | 11.64            | $3.821 \times 10^{-6}$     | 21.30          | $7.1307 \times 10^{-6}$    |
| UU014      | BRAF p.V600E      | 21.29            | $2.032 \times 10^{-3}$  | 11.48                | $4.7223 \times 10^{-6}$  | 21.60            | $5.794 \times 10^{-6}$     | N/A            | N/A                        |
| UU015      | BRAF p.V600E      | 18.45            | $1.4 \times 10^{-5}$    | N/A                  | N/A                      | 27.00            | $6.9854 \times 10^{-6}$    | 12.00          | $5.4248 \times 10^{-6}$    |
| UU015      | PIK3CA p.H1047R   | 18.45            | $1.830 \times 10^{-3}$  | N/A                  | N/A                      | 27.00            | $5.4652 \times 10^{-6}$    | 12.00          | $9.0385 \times 10^{-6}$    |
| UU017      | BRAF p.V600E      | 25.25            | $3.7850 \times 10^{-2}$ | N/A                  | N/A                      | 50.10            | $7.6084 \times 10^{-6}$    | 37.80          | $4.0263 \times 10^{-6}$    |
| UU018      | KRAS p.G13D       | 19.58            | $5.532 \times 10^{-3}$  | N/A                  | N/A                      | 13.80            | $2.8137 \times 10^{-6}$    | 23.40          | $3.4004 \times 10^{-6}$    |
| UU020      | KRAS p.G12D       | 32.09            | $3.60 \times 10^{-4}$   | N/A                  | N/A                      | 20.40            | $1.0193 \times 10^{-5}$    | 20.70          | $2.2713 \times 10^{-6}$    |
| UU025      | NRAS p.G12D       | 35.70            | $1.136 \times 10^{-3}$  | N/A                  | N/A                      | 32.10            | $3.9785 \times 10^{-6}$    | 26.70          | $4.1889 \times 10^{-6}$    |
| UU035      | KRAS p.G12V       | 13.50            | $4.689 \times 10^{-3}$  | N/A                  | N/A                      | 33.0             | $3.0094103 \times 10^{-1}$ | N/A            | N/A                        |
| UU036      | BRAF p.V600E      | 16.50            | $5.80 \times 10^{-4}$   | 27.00                | $1.0387 \times 10^{-5}$  | 15.90            | $3.738 \times 10^{-6}$     | N/A            | N/A                        |
| UU037      | KRAS p.G13C       | N/A              | N/A                     | 24.00                | $1.0 \times 10^{-5}$     | 18.00            | $9.7298 \times 10^{-4}$    | 23.40          | $4.460193 \times 10^{-2}$  |
| UU037      | PIK3CA p.H1047L   | N/A              | N/A                     | 24.00                | $3.0 \times 10^{-6}$     | 18.00            | $1.4937 \times 10^{-3}$    | 23.40          | $2.544395 \times 10^{-2}$  |
| UU038      | PIK3CA p.E542K    | 22.80            | $7.0 \times 10^{-6}$    | N/A                  | N/A                      | 27.00            | $6.8573 \times 10^{-6}$    | 30.90          | $7.877 \times 10^{-6}$     |

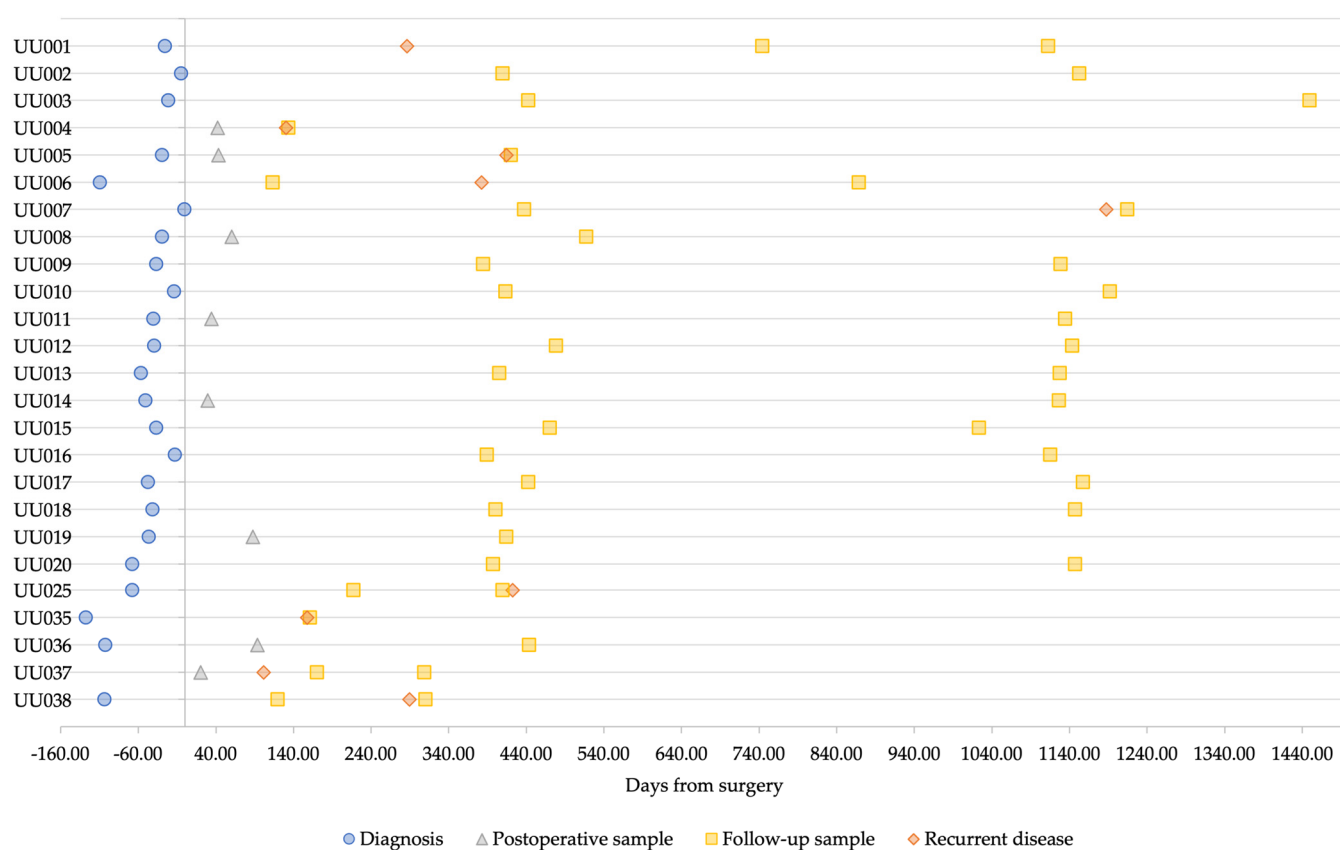

**Figure S1.** Days from surgery to diagnosis, postoperative and follow-up plasma samples for all 25 patients and days to recurrent disease for applicable patients. UU004 did not have surgery, hence time points are from diagnosis.

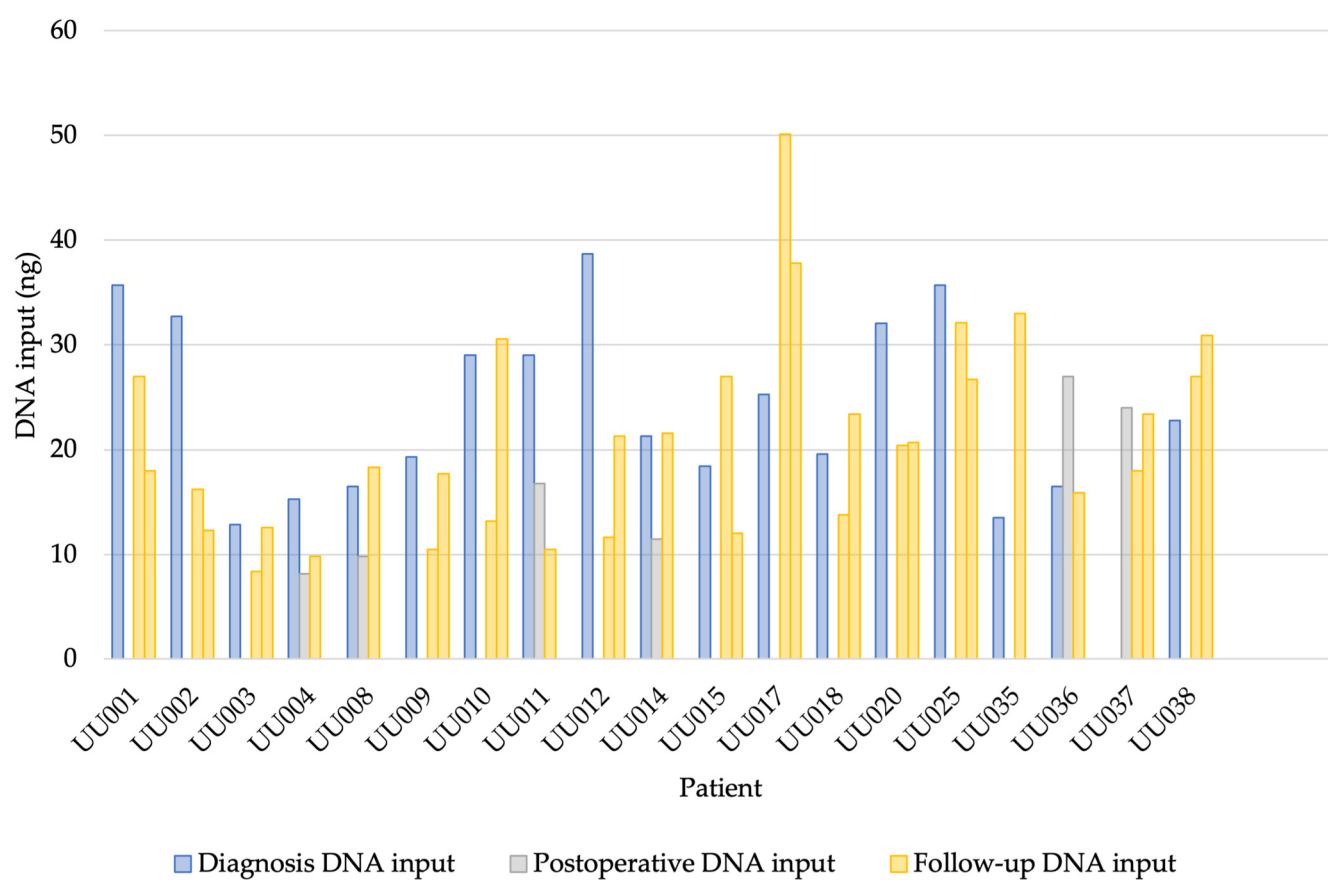

**Figure S2.** Total cell-free DNA input for plasma samples at diagnosis, postoperatively and during follow-up.
